# Supplementary material for: The Potential of Metarhizium anisopliae Blastospores to Control Aedes aegypti Larvae in the Field
Source: MDPI journal article supplement (doi:10.3390/jof9070759), 2023-07-18
Supplement: s1 [file s1]

## Supplementary material

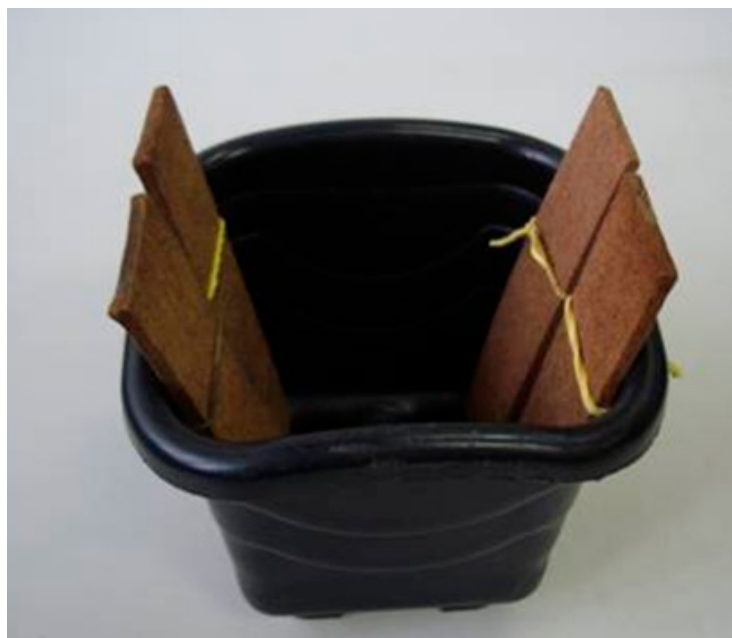

**Figure S1.** Ovitrap used for collecting *Aedes* eggs in the field.

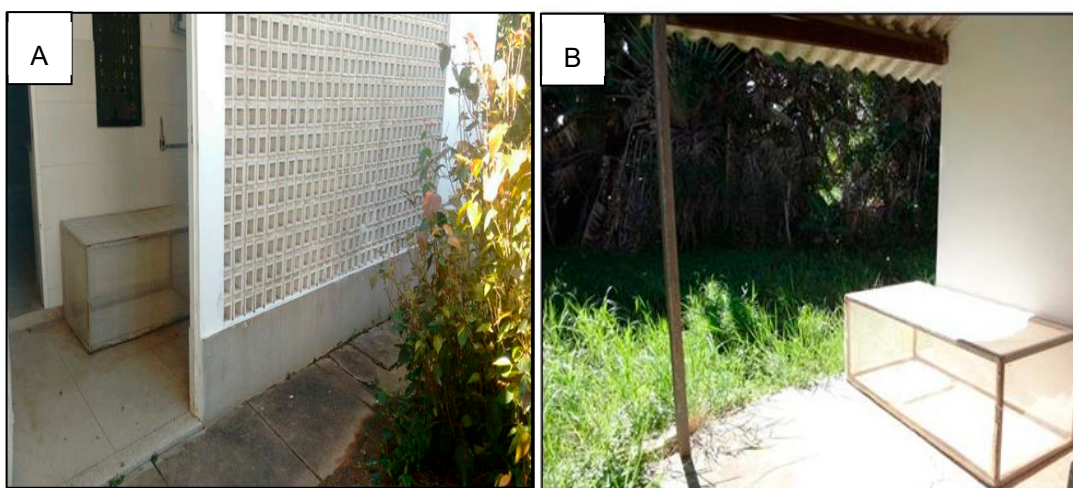

**Figure S2.** Two types of field conditions used in the evaluation of blastospore virulence. (A) Totally shaded conditions and (B) Partially shaded conditions. The large cages were used to prevent predators from interfering with the experiments. The partially shaded conditions had direct sunlight from approximately 11 am to 4 pm.
